# Supplementary material for: Treatment of Pulmonary Embolism With Rivaroxaban: Outcomes by Simplified Pulmonary Embolism Severity Index Score from a Post Hoc Analysis of the EINSTEIN PE Study
Source: PubMed Central journal article supplement — Acad Emerg Med. 2015 Feb 25;22(3):299–307. doi: 10.1111/acem.12615 (PMC4405051; doi:10.1111/acem.12615), 2015-02-25
Supplement: acem0022-0299-sd1.pdf [file acem0022-0299-sd1.pdf]

**Data Supplement 1:** Association of Pulmonary Embolism Severity Index (PESI) scores with outcomes. Estimates of main treatment effects by time period using logistic regression models.

| <b>Time Window</b>                | <b>Outcome Variable</b>           | <b>Effect</b>                 | <b>Odds Ratio</b> | <b>95% CI</b> |
|-----------------------------------|-----------------------------------|-------------------------------|-------------------|---------------|
| Up to 7 days after randomization  | Recurrent VTE                     | PESI 1 vs. 0                  | 0.808             | 0.248–2.343   |
|                                   | Recurrent VTE                     | PESI ≥2 vs. 0                 | 4.350             | 1.547–11.738  |
|                                   | Recurrent VTE                     | Rivaroxaban vs enoxaparin/VKA | 1.077             | 0.453–2.594   |
|                                   | PE-related death                  | PESI 1 vs. 0                  | 1.519             | 0.060–38.416  |
|                                   | PE-related death                  | PESI ≥2 vs. 0                 | 17.573            | 2.242–355.792 |
|                                   | PE-related death                  | Rivaroxaban vs enoxaparin/VKA | 0.235             | 0.012–1.594   |
|                                   | All deaths                        | PESI 1 vs. 0                  | 2.964             | 0.284–63.794  |
|                                   | All deaths                        | PESI ≥2 vs. 0                 | 40.105            | 7.108–751.068 |
|                                   | All deaths                        | Rivaroxaban vs enoxaparin/VKA | 0.617             | 0.157–2.176   |
|                                   | Major bleeding                    | PESI 1 vs. 0                  | 1.064             | 0.314–3.340   |
|                                   | Major bleeding                    | PESI ≥2 vs. 0                 | 4.102             | 1.209–12.916  |
|                                   | Major bleeding                    | Rivaroxaban vs enoxaparin/VKA | 0.531             | 0.183–1.401   |
|                                   | Up to 14 days after randomization | Recurrent VTE                 | PESI 1 vs. 0      | 1.255         |
| Recurrent VTE                     |                                   | PESI ≥2 vs. 0                 | 3.626             | 1.502–8.318   |
| Recurrent VTE                     |                                   | Rivaroxaban vs enoxaparin/VKA | 0.922             | 0.469–1.801   |
| PE-related death                  |                                   | PESI 1 vs. 0                  | 1.502             | 0.180–12.533  |
| PE-related death                  |                                   | PESI ≥2 vs. 0                 | 8.658             | 1.430–65.926  |
| PE-related death                  |                                   | Rivaroxaban vs enoxaparin/VKA | 0.382             | 0.055–1.778   |
| All deaths                        |                                   | PESI 1 vs. 0                  | 2.967             | 0.578–21.415  |
| All deaths                        |                                   | PESI ≥2 vs. 0                 | 25.893            | 6.641–170.270 |
| All deaths                        |                                   | Rivaroxaban vs enoxaparin/VKA | 0.621             | 0.207–1.733   |
| Major bleeding                    |                                   | PESI 1 vs. 0                  | 1.120             | 0.456–2.654   |
| Major bleeding                    |                                   | PESI ≥2 vs. 0                 | 2.880             | 0.998–7.464   |
| Major bleeding                    |                                   | Rivaroxaban vs enoxaparin/VKA | 0.489             | 0.209–1.064   |
| Up to 30 days after randomization |                                   | Recurrent VTE                 | PESI 1 vs. 0      | 1.393         |
|                                   | Recurrent VTE                     | PESI ≥2 vs. 0                 | 3.588             | 1.683–7.358   |
|                                   | Recurrent VTE                     | Rivaroxaban vs enoxaparin/VKA | 0.861             | 0.486–1.515   |
|                                   | PE-related death                  | PESI 1 vs. 0                  | 2.991             | 0.583–21.593  |
|                                   | PE-related death                  | PESI ≥2 vs. 0                 | 8.596             | 1.420–65.430  |
|                                   | PE-related death                  | Rivaroxaban vs enoxaparin/VKA | 0.475             | 0.100–1.805   |
|                                   | All deaths                        | PESI 1 vs. 0                  | 10.287            | 2.869–65.558  |

| Time Window                            | Outcome Variable                             | Effect                        | Odds Ratio          | 95% CI         |             |
|----------------------------------------|----------------------------------------------|-------------------------------|---------------------|----------------|-------------|
| Up to 90 days after randomization      | All deaths                                   | PESI $\geq 2$ vs. 0           | 48.888              | 13.949–308.965 |             |
|                                        | All deaths                                   | Rivaroxaban vs enoxaparin/VKA | 0.988               | 0.493–1.987    |             |
|                                        | Major bleeding                               | PESI 1 vs. 0                  | 1.200               | 0.549–2.568    |             |
|                                        | Major bleeding                               | PESI $\geq 2$ vs. 0           | 3.495               | 1.458–7.911    |             |
|                                        | Major bleeding                               | Rivaroxaban vs enoxaparin/VKA | 0.427               | 0.201–0.849    |             |
|                                        | Recurrent VTE                                | PESI 1 vs. 0                  | 1.107               | 0.650–1.863    |             |
|                                        | Recurrent VTE                                | PESI $\geq 2$ vs. 0           | 2.750               | 1.464–4.960    |             |
|                                        | Recurrent VTE                                | Rivaroxaban vs enoxaparin/VKA | 0.983               | 0.619–1.560    |             |
|                                        | PE-related death                             | PESI 1 vs. 0                  | 1.454               | 0.343–6.159    |             |
|                                        | PE-related death                             | PESI $\geq 2$ vs. 0           | 6.965               | 1.835–28.237   |             |
|                                        | PE-related death                             | Rivaroxaban vs enoxaparin/VKA | 1.124               | 0.372–3.502    |             |
|                                        | All deaths                                   | PESI 1 vs. 0                  | 3.527               | 1.731–7.745    |             |
|                                        | All deaths                                   | PESI $\geq 2$ vs. 0           | 16.406              | 8.174–35.736   |             |
|                                        | All deaths                                   | Rivaroxaban vs enoxaparin/VKA | 1.076               | 0.648–1.796    |             |
| Up to end of intended treatment period | Major bleeding                               | PESI 1 vs. 0                  | 1.573               | 0.847–2.930    |             |
|                                        | Major bleeding                               | PESI $\geq 2$ vs. 0           | 3.191               | 1.466–6.594    |             |
|                                        | Major bleeding                               | Rivaroxaban vs enoxaparin/VKA | 0.512               | 0.282–0.898    |             |
|                                        | Recurrent VTE                                | PESI 1 vs. 0                  | 1.109               | 0.693–1.760    |             |
|                                        | Recurrent VTE                                | PESI $\geq 2$ vs. 0           | 2.702               | 1.541–4.586    |             |
|                                        | Recurrent VTE                                | Rivaroxaban vs enoxaparin/VKA | 1.121               | 0.744–1.694    |             |
|                                        | PE-related death                             | PESI 1 vs. 0                  | 1.441               | 0.400–5.189    |             |
|                                        | PE-related death                             | PESI $\geq 2$ vs. 0           | 8.877               | 2.947–29.500   |             |
|                                        | PE-related death                             | Rivaroxaban vs enoxaparin/VKA | 1.511               | 0.592–4.122    |             |
|                                        | All deaths                                   | PESI 1 vs. 0                  | 4.450               | 2.533–8.277    |             |
|                                        | All deaths                                   | PESI $\geq 2$ vs. 0           | 19.595              | 11.141–36.501  |             |
|                                        | All deaths                                   | Rivaroxaban vs enoxaparin/VKA | 1.097               | 0.743–1.624    |             |
|                                        | Up to last dose of study medication + 2 days | Major bleeding                | PESI 1 vs. 0        | 1.900          | 1.144–3.187 |
|                                        |                                              | Major bleeding                | PESI $\geq 2$ vs. 0 | 3.706          | 1.965–6.803 |
| Major bleeding                         |                                              | Rivaroxaban vs enoxaparin/VKA | 0.478               | 0.293–0.761    |             |

CI = confidence interval; PE = pulmonary embolism; PESI = Pulmonary Embolism Severity Index; VKA = vitamin K antagonist; VTE = venous thromboembolism.
