# Supplementary material for: Treatment of Pulmonary Embolism With Rivaroxaban: Outcomes by Simplified Pulmonary Embolism Severity Index Score from a Post Hoc Analysis of the EINSTEIN PE Study
Source: PubMed Central journal article supplement — Acad Emerg Med. 2015 Feb 25;22(3):299–307. doi: 10.1111/acem.12615 (PMC4405051; doi:10.1111/acem.12615), 2015-02-25
Supplement: acem0022-0299-sd2.pdf [file acem0022-0299-sd2.pdf]

**Data Supplement 2:** Any adverse outcomes from the EINSTEIN PE study in relation to simplified Pulmonary Embolism Severity Index score and time period: (A)  $\leq 7$  days; (B)  $\leq 14$  days; (C)  $\leq 30$  days; (D)  $\leq 90$  days; and (E) full treatment period.

**A:  $\leq 7$  days**

| <b>PESI Score</b> | <b>Outcome</b>              | <b>Rivaroxaban<br/>(n = 2,419)<br/>n/N (%)</b> | <b>Standard Therapy*<br/>(n = 2,412)<br/>n/N (%)</b> |
|-------------------|-----------------------------|------------------------------------------------|------------------------------------------------------|
| 0                 | Recurrent VTE               | 5/1,256 (0.4)                                  | 4/1,333 (0.3)                                        |
|                   | Fatal PE                    | 0/1,256 (0.0)                                  | 1/1,333 (<0.1)                                       |
|                   | All-cause mortality         | 0/1,256 (0.0)                                  | 1/1,333 (<0.1)                                       |
|                   | Major bleeding <sup>†</sup> | 4/1,254 (0.3)                                  | 3/1,329 (0.2)                                        |
| 1                 | Recurrent VTE               | 2/919 (0.2)                                    | 3/856 (0.4)                                          |
|                   | Fatal PE                    | 0/919 (0.0)                                    | 1/856 (0.1)                                          |
|                   | All-cause mortality         | 1/919 (0.1)                                    | 1/856 (0.1)                                          |
|                   | Major bleeding <sup>†</sup> | 0/916 (0.0)                                    | 5/853 (0.6)                                          |
| $\geq 2$          | Recurrent VTE               | 4/244 (1.6)                                    | 3/223 (1.3)                                          |
|                   | Fatal PE                    | 1/244 (0.4)                                    | 2/223 (0.9)                                          |
|                   | All-cause mortality         | 3/244 (1.2)                                    | 4/223 (1.8)                                          |
|                   | Major bleeding <sup>†</sup> | 2/242 (0.8)                                    | 3/222 (1.4)                                          |

**B:  $\leq 14$  days**

| <b>PESI Score</b> | <b>Outcome</b>              | <b>Rivaroxaban<br/>(n = 2,419)<br/>n/N (%)</b> | <b>Standard Therapy*<br/>(n = 2,412)<br/>n/N (%)</b> |
|-------------------|-----------------------------|------------------------------------------------|------------------------------------------------------|
| 0                 | Recurrent VTE               | 7/1,256 (0.6)                                  | 7/1,333 (0.5)                                        |
|                   | Fatal PE                    | 0/1,256 (0.0)                                  | 2/1,333 (0.2)                                        |
|                   | All-cause mortality         | 0/1,256 (0.0)                                  | 2/1,333 (0.2)                                        |
|                   | Major bleeding <sup>†</sup> | 6/1,254 (0.5)                                  | 6/1,329 (0.5)                                        |
| 1                 | Recurrent VTE               | 6/919 (0.7)                                    | 6/856 (0.7)                                          |
|                   | Fatal PE                    | 1/919 (0.1)                                    | 1/856 (0.1)                                          |
|                   | All-cause mortality         | 2/919 (0.2)                                    | 2/856 (0.2)                                          |
|                   | Major bleeding <sup>†</sup> | 1/916 (0.1)                                    | 8/853 (0.9)                                          |
| $\geq 2$          | Recurrent VTE               | 4/244 (1.6)                                    | 5/223 (2.2)                                          |
|                   | Fatal PE                    | 1/244 (0.4)                                    | 2/223 (0.9)                                          |
|                   | All-cause mortality         | 4/244 (1.6)                                    | 5/223 (2.2)                                          |
|                   | Major bleeding <sup>†</sup> | 2/242 (0.8)                                    | 4/222 (1.8)                                          |

**C: ≤ 30 days**

| <b>PESI Score</b> | <b>Outcome</b>              | <b>Rivaroxaban<br/>(n = 2,419)<br/>n/N (%)</b> | <b>Standard Therapy*<br/>(n = 2,412)<br/>n/N (%)</b> |
|-------------------|-----------------------------|------------------------------------------------|------------------------------------------------------|
| 0                 | Recurrent VTE               | 10/1,256 (0.8)                                 | 9/1,333 (0.7)                                        |
|                   | Fatal PE                    | 0/1,256 (0.0)                                  | 2/1,333 (0.2)                                        |
|                   | All-cause mortality         | 0/1,256 (0.0)                                  | 2/1,333 (0.2)                                        |
|                   | Major bleeding <sup>†</sup> | 6/1,254 (0.5)                                  | 9/1,329 (0.7)                                        |
| 1                 | Recurrent VTE               | 9/919 (1.0)                                    | 9/856 (1.1)                                          |
|                   | Fatal PE                    | 2/919 (0.2)                                    | 2/856 (0.2)                                          |
|                   | All-cause mortality         | 7/919 (0.8)                                    | 7/856 (0.8)                                          |
|                   | Major bleeding <sup>†</sup> | 3/916 (0.3)                                    | 9/853 (1.1)                                          |
| ≥2                | Recurrent VTE               | 4/244 (1.6)                                    | 8/223 (3.6)                                          |
|                   | Fatal PE                    | 1/244 (0.4)                                    | 2/223 (0.9)                                          |
|                   | All-cause mortality         | 10/244 (4.1)                                   | 7/223 (3.1)                                          |
|                   | Major bleeding <sup>†</sup> | 2/242 (0.8)                                    | 7/222 (3.2)                                          |

**D: ≤ 90 days**

| <b>PESI Score</b> | <b>Outcome</b>              | <b>Rivaroxaban<br/>(n = 2,419)<br/>n/N (%)</b> | <b>Standard Therapy*<br/>(n = 2,412)<br/>n/N (%)</b> |
|-------------------|-----------------------------|------------------------------------------------|------------------------------------------------------|
| 0                 | Recurrent VTE               | 18/1,256 (1.4)                                 | 15/1,333 (1.1)                                       |
|                   | Fatal PE                    | 2/1,256 (0.2)                                  | 2/1,333 (0.2)                                        |
|                   | All-cause mortality         | 6/1,256 (0.5)                                  | 4/1,333 (0.3)                                        |
|                   | Major bleeding <sup>†</sup> | 9/1,254 (0.7)                                  | 11/1,329 (0.8)                                       |
| 1                 | Recurrent VTE               | 13/919 (1.4)                                   | 12/856 (1.4)                                         |
|                   | Fatal PE                    | 2/919 (0.2)                                    | 2/856 (0.2)                                          |
|                   | All-cause mortality         | 13/919 (1.4)                                   | 11/856 (1.3)                                         |
|                   | Major bleeding <sup>†</sup> | 6/916 (0.7)                                    | 15/853 (1.8)                                         |
| ≥2                | Recurrent VTE               | 6/244 (2.5)                                    | 10/223 (4.5)                                         |
|                   | Fatal PE                    | 3/244 (1.2)                                    | 2/223 (0.9)                                          |
|                   | All-cause mortality         | 14/244 (5.7)                                   | 14/223 (6.3)                                         |
|                   | Major bleeding <sup>†</sup> | 3/242 (1.2)                                    | 8/222 (3.6)                                          |

**E: Full treatment period**

| <b>PESI Score</b> | <b>Outcome</b>              | <b>Rivaroxaban<br/>(n = 2,419)<br/>n/N (%)</b> | <b>Standard Therapy*<br/>(n = 2,412)<br/>n/N (%)</b> |
|-------------------|-----------------------------|------------------------------------------------|------------------------------------------------------|
| 0                 | Recurrent VTE               | 24/1,256 (1.9)                                 | 18/1,333 (1.4)                                       |
|                   | Fatal PE                    | 3/1,256 (0.2)                                  | 2/1,333 (0.2)                                        |
|                   | All-cause mortality         | 8/1,256 (0.6)                                  | 7/1,333 (0.5)                                        |
|                   | Major bleeding <sup>†</sup> | 11/1,254 (0.9)                                 | 16/1,329 (1.2)                                       |
| 1                 | Recurrent VTE               | 17/919 (1.8)                                   | 15/856 (1.8)                                         |
|                   | Fatal PE                    | 3/919 (0.3)                                    | 2/856 (0.2)                                          |
|                   | All-cause mortality         | 26/919 (2.8)                                   | 19/856 (2.2)                                         |
|                   | Major bleeding <sup>†</sup> | 10/916 (1.1)                                   | 24/853 (2.8)                                         |
| ≥2                | Recurrent VTE               | 9/244 (3.7)                                    | 11/223 (4.9)                                         |
|                   | Fatal PE                    | 5/244 (2.0)                                    | 3/223 (1.3)                                          |
|                   | All-cause mortality         | 24/244 (9.8)                                   | 24/223 (10.8)                                        |
|                   | Major bleeding <sup>†</sup> | 5/242 (2.1)                                    | 12/222 (5.4)                                         |

\*Standard therapy consisted of subcutaneous enoxaparin overlapping with and followed by a vitamin K antagonist (warfarin or acenocoumarol; target international normalized ratio 2.0–3.0).<sup>1</sup>

<sup>†</sup>Major bleeding defined according to the Control of Anticoagulation Subcommittee (ISTH SSC 2004): fatal bleeding and/or: symptomatic bleeding in a critical area or organ, such as intracranial, intraspinal, intraocular, retroperitoneal, intra-articular or pericardial, or intramuscular with compartment syndrome; bleeding causing a fall in hemoglobin level of 20 g/L (1.24 mmol/L) or more, or leading to transfusion of ≥ 2 units of whole blood or red cells<sup>2</sup> (data derived from the safety population).

PE = pulmonary embolism; PESI = Pulmonary Embolism Severity Index; VTE = venous thromboembolism.

**References**

1. The EINSTEIN–PE Investigators. Oral rivaroxaban for the treatment of symptomatic pulmonary embolism. *N Engl J Med* 2012;366:1287-97.
2. Schulman S, Kearon C. Definition of major bleeding in clinical investigations of antihemostatic medicinal products in non-surgical patients. *J Thromb Haemost* 2005;3:692-4.
